# Supplementary material for: Intestinal parasites and HIV in Ethiopian tuberclosis patients: A systematic review and meta-analysis
Source: PubMed Central journal article supplement — Curr Ther Res Clin Exp. 2020 Aug 26;93:100603. doi: 10.1016/j.curtheres.2020.100603 (PMC7490528; doi:10.1016/j.curtheres.2020.100603), 2020-08-26
Supplement: mmc2.pdf [file mmc2.pdf]

| Table S1: Risk of Bias assessment Tool of Eligible Articles by using the Hoy 2012 tool |                   |                    |           |                     |                      |                    |                 |                                           |                              |                      |                              |                       |
|----------------------------------------------------------------------------------------|-------------------|--------------------|-----------|---------------------|----------------------|--------------------|-----------------|-------------------------------------------|------------------------------|----------------------|------------------------------|-----------------------|
| NO                                                                                     | Study ID          | Representa<br>tion | Sampling  | Random<br>selection | Non response<br>bias | Data<br>collection | Case Definition | Reliability and validity<br>of study tool | Method of data<br>collection | Prevalence<br>period | Numerator and<br>denominator | Summary<br>Assessment |
| 1                                                                                      | A. Kassu et al    | High risk          | High risk | Not clear           | Low risk             | Low risk           | Low risk        | High risk                                 | Low risk                     | low risk             | Low risk                     | High risk             |
| 2                                                                                      | D. Elias et al    | Low risk           | Low risk  | Low risk            | High risk            | Low risk           | Low risk        | Low risk                                  | Low risk                     | Low risk             | Low risk                     | Low risk              |
| 3                                                                                      | J.M. Ramos et al  | High risk          | High risk | High risk           | High risk            | Low risk           | Low risk        | High risk                                 | Low risk                     | Low risk             | Low risk                     | Medium risk           |
| 4                                                                                      | Alework, et al    | Low risk           | Low risk  | Not clear           | Low risk             | High risk          | Low risk        | High risk                                 | Low risk                     | Low risk             | Low risk                     | High risk             |
| 5                                                                                      | Mohammed T. et al | Low risk           | Low risk  | Low risk            | Low risk             | Low risk           | Low risk        | Low risk                                  | Low risk                     | Low risk             | Low risk                     | Low risk              |
| 6                                                                                      | Abate et al       | High risk          | Low risk  | High risk           | Low risk             | Low risk           | Low risk        | Low risk                                  | Low risk                     | Low risk             | Low risk                     | Medium risk           |
| 7                                                                                      | Alemayehu et al   | Low risk           | Low risk  | Low risk            | Low risk             | Low risk           | Low risk        | Low risk                                  | Low risk                     | medium risk          | Low risk                     | Low risk              |
| 8                                                                                      | Abate et al       | Low risk           | Low risk  | Low risk            | Low risk             | Low risk           | Low risk        | Low risk                                  | Low risk                     | Low risk             | Low risk                     | Low risk              |
| 9                                                                                      | Hailu et al       | High risk          | High risk | Low risk            | Low risk             | Low risk           | Low risk        | Low risk                                  | Low risk                     | Low risk             | Low risk                     | Low risk              |
| 10                                                                                     | Alemu and Mama    | Low risk           | Low risk  | Low risk            | Low risk             | Low risk           | Low risk        | Low risk                                  | Low risk                     | Low risk             | Low risk                     | Low risk              |
| 11                                                                                     | Alemu et al       | High risk          | Low risk  | Low risk            | Low risk             | Low risk           | High risk       | Low risk                                  | Low risk                     | Low risk             | Low risk                     | Low risk              |
| 12                                                                                     | Tegegne et al     | Low risk           | Low risk  | Low risk            | High risk            | Low risk           | Low risk        | High risk                                 | Low risk                     | Low risk             | Low risk                     | High risk             |

22 **Risk of bias assessment tool: Yes (low risk); No (high risk)**

- 23 1. Representation: Was the study population a close representation of the national population?  
24 2. Sampling: Was the sampling frame a true or close representation of the target population?  
25 3. Random selection: Was some form of random selection used to select the sample OR was a census undertaken?  
26 4. Non-response bias: Was the likelihood of non-response bias minimal?  
27 5. Data collection: Were data collected directly from the subjects?  
28 6. Case definition: Was an acceptable case definition used in the study?  
29 7. Reliability and validity of study tool: Was the study instrument that measured the parameter of interest show to have reliability and validity?  
30 8. Data collection: Was the same mode of data collection used for all subjects?  
31 9. Prevalence period: Was the length of the prevalence period for the parameter of interest appropriate?  
10. Numerators and denominators: Were the numerator(s) and denominator(s) for the parameter of interest appropriate?

The overall risk of bias scored based on the number of high risk of bias per study: low risk ( $\leq 2$ ), moderate risk (3-4), and high risk ( $\geq 5$ ).
